# Supplementary material for: ﻿Refining the phylogeny and taxonomy of the apple tribe Maleae (Rosaceae): insights from phylogenomic analyses of 563 plastomes and a taxonomic synopsis of Photinia and its allies in the Old World
Source: PubMed Central journal article supplement (PMC11161682; doi:10.3897/phytokeys.242.117481), 2024-05-31

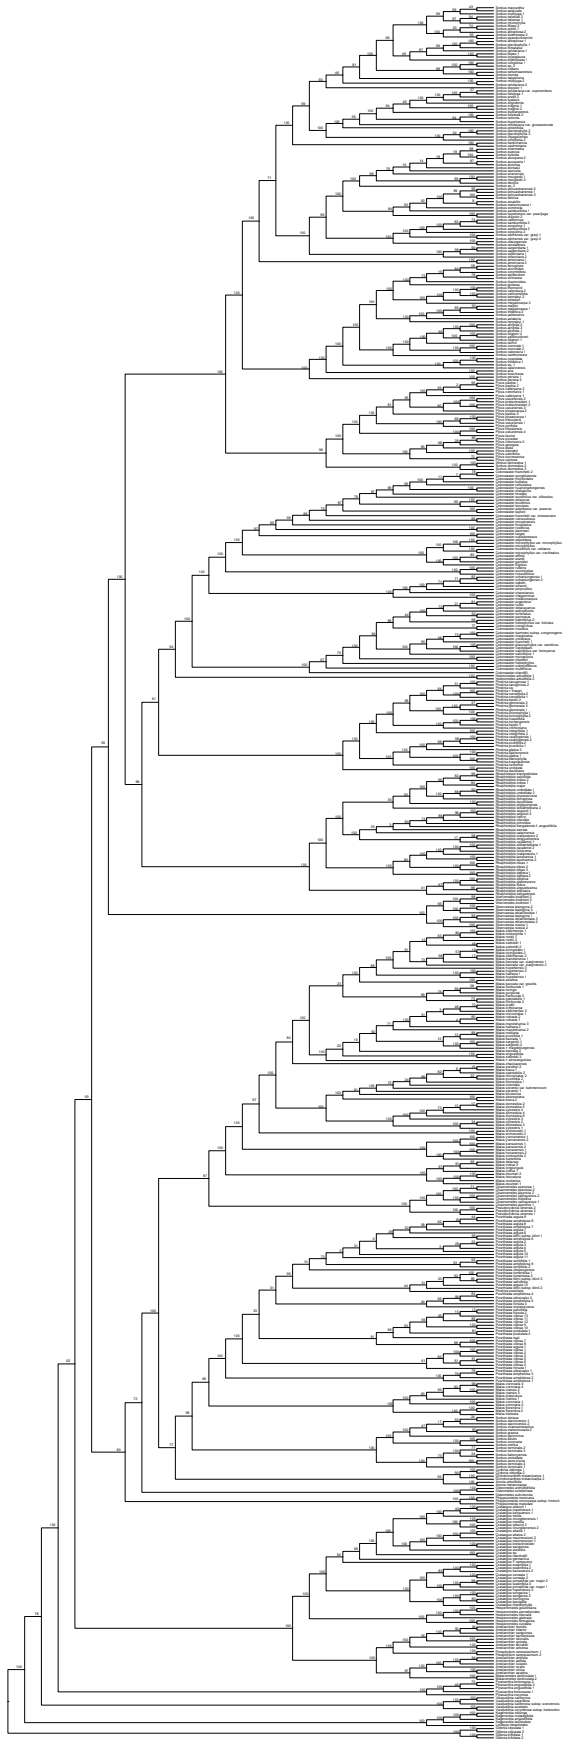

Supplement: phytokeys-242-161_article-117481__-s002.pdf [file phytokeys-242-161_article-117481__-s002.pdf]
